# Supplementary material for: Systematic Evaluation of the Patient-Reported Outcome (PRO) Content of Clinical Trial Protocols
Source: PLoS One. 2014 Oct 15;9(10):e110229. doi: 10.1371/journal.pone.0110229 (PMC4198237; doi:10.1371/journal.pone.0110229)
Supplement: Appendix S3 — Full multiple regression model. (XLSX) [file pone.0110229.s003.xlsx]

## Sheet: Sheet1
FULL REGRESSION MODEL
PARAMETER ESTIMATES
EFFECT	CLINICAL AREA	ESTIMATE	P-VALUE	95% CI - LOWER	95% CI - UPPER
INTERCEPT		10.459	<0.001	5.281	15.636
SPIRIT SCORE		0.081	0.167	-0.035	0.198
PRO NOT PRIMARY OUTCOME		-4.993	<0.001	-6.358	3.628
NOT PRIMARY CARE		-1.447	0.052	-2.908	0.014
YEAR 2012		1.253	0.091	-0.212	2.718
CLINICAL AREA	AIDS	-0.205	0.946	-6.24	5.829
CLINICAL AREA	CARDIAC	1.464	0.522	-3.105	6.032
CLINICAL AREA	COLORECTAL	1.729	0.586	-4.618	8.075
CLINICAL AREA	DERMATOLOGY	-0.36	0.908	-6.601	5.882
CLINICAL AREA	DIABETES	7.212	0.022	1.098	13.324
CLINICAL AREA	ELDERLY CARE	6.292	0.044	0.187	12.396
CLINICAL AREA	EMERGENCY SERVICES	-0.593	0.839	-6.417	5.232
CLINICAL AREA	FALLS PREVENTION	4.864	0.052	-0.041	9.77
CLINICAL AREA	GASTROENTEROLOGY	-1.846	0.463	-6.861	3.169
CLINICAL AREA	GENERAL PRACTICE WAITING TIMES	6.163	0.038	0.363	11.963
CLINICAL AREA	HEPATOLOGY	-0.879	0.769	-6.867	5.108
CLINICAL AREA	MENTAL HEALTH	0.713	0.701	-3.006	4.432
CLINICAL AREA	NEPHROLOGY	1.438	0.637	-4.643	7.519
CLINICAL AREA	NEUROLOGY	1.107	0.584	-2.932	5.146
CLINICAL AREA	OBSTETRICS AND GYNAECOLOGY	1.712	0.457	-2.874	6.2979
CLINICAL AREA	ONCOLOGY	1.814	0.425	-2.7199	6.348
CLINICAL AREA	ORTHOPAEDICS	2.231	0.321	-2.243	6.705
CLINICAL AREA	PAEDIATRICS	2.053	0.313	-1.993	6.099
CLINICAL AREA	PHYSICAL ACTIVITY	-0.1504	0.946	-4.5799	4.279
CLINICAL AREA	RESPIRATORY	2.226	0.315	-2.18	6.632
CLINICAL AREA	SMOKING CESSATION	-0.8979	0.687	-5.358	3.562
CLINICAL AREA	UROLOGY	2.445	0.4296	-3.728	8.619
CLINICAL AREA	VASCULAR	0.8195	0.6887	-3.27	4.909
CLINICAL AREA	WEIGHT LOSS	0*
COMBINED CLINICAL AREA			0.158
SCALE		5.5316	1.1411
*Comparator
